# Supplementary material for: Controllable synthesis of Ir(Rh)–Sn/SiO2 bimetallic catalysts via surface organometallic chemistry for the production of ethanol from hydrogenolysis of ethyl acetate
Source: Royal Society of Chemistry journal article supplement (doi:10.1039/c9cy02071c), 2019-12-26
Supplement: c9cy02071c1.pdf [file c9cy02071c1.pdf]

# Controllable Synthesis of Ir(Rh)-Sn/SiO<sub>2</sub> Bimetallic Catalysts via Surface Organometallic Chemistry for the Production of Ethanol from Hydrogenolysis of Ethyl Acetate

Rui Xu,<sup>a</sup> Kunbo Lian,<sup>a</sup> Zhikang Xu,<sup>a</sup> Yuanyuan Yue,<sup>a</sup> Pei Yuan,<sup>\*b</sup> Xiaojun Bao,<sup>a</sup> Xiaohong Yuan,<sup>c</sup>  
and Haibo Zhu<sup>\*a</sup>

<sup>a</sup> National Engineering Research Center of Chemical Fertilizer Catalyst, School of Chemical Engineering, Fuzhou University, Fuzhou 350002, China

<sup>b</sup> State Key Laboratory of Photocatalysis on Energy and Environment, Fuzhou University, Fuzhou 350116, China

<sup>c</sup> Shanghai Research Institute of Petrochemical Technology, SINOPEC, Shanghai 201208, China

Corresponding author:

Pei Yuan, yuanpei@fzu.edu.cn

Haibo Zhu, haibo.zhu@fzu.edu.cn

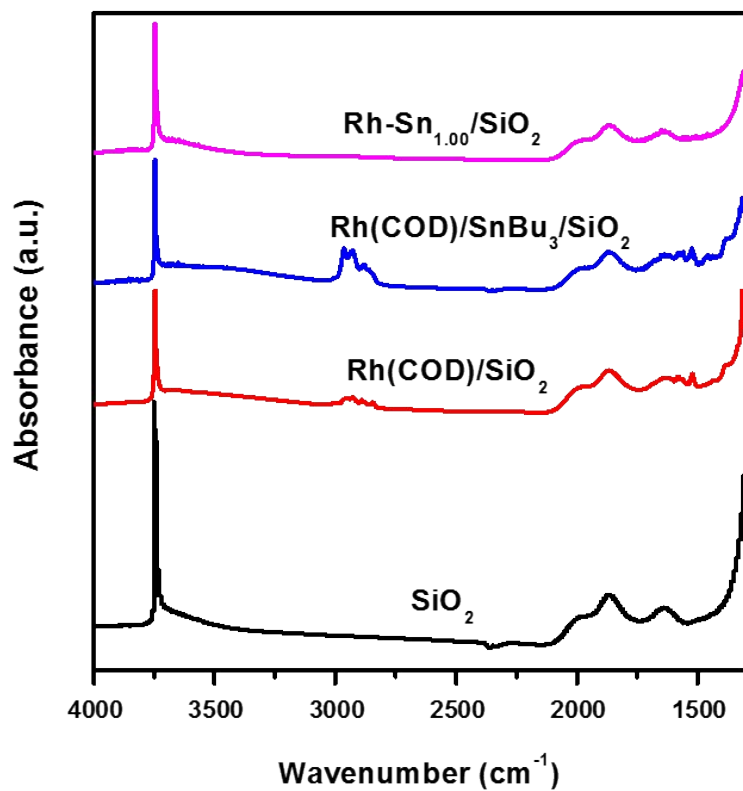

**Figure S1.** IR spectra of dehydroxylated SiO<sub>2</sub>, Rh(COD)/SiO<sub>2</sub>, Rh(COD)/SnBu<sub>3</sub>/SiO<sub>2</sub> and Rh-Sn<sub>1.00</sub>/SiO<sub>2</sub> obtained from the H<sub>2</sub> treatment of Rh(COD)/SnBu<sub>3</sub>/SiO<sub>2</sub> at 400 °C.

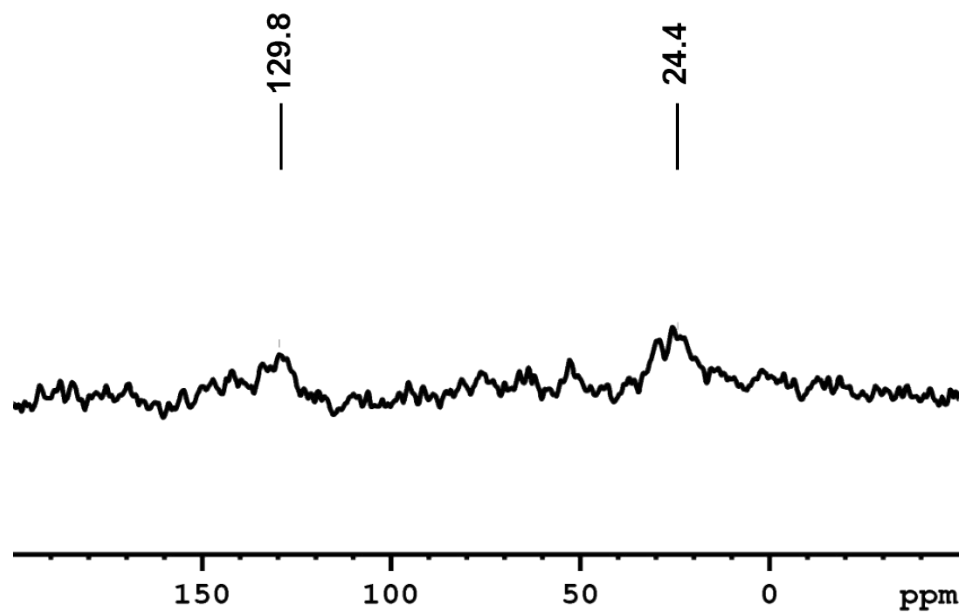

**Figure S2.**  $^{13}\text{C}$  CP/MAS spectrum of monometallic surface compound Rh(COD)/SiO<sub>2</sub>.

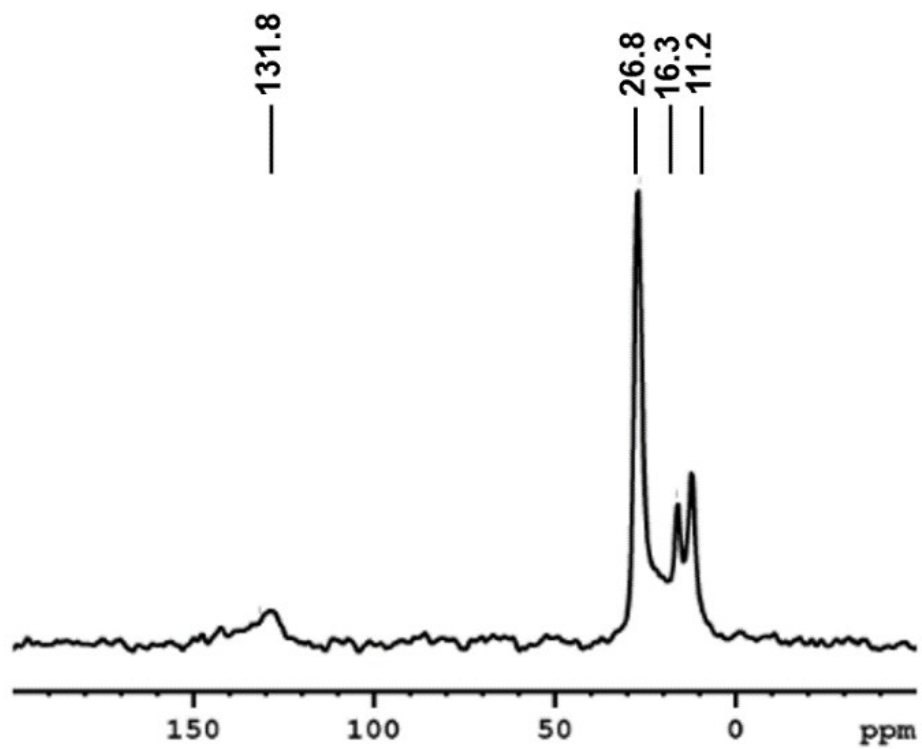

**Figure S3.**  $^{13}\text{C}$  CP/MAS spectrum of bimetallic surface compound  $\text{Rh}(\text{COD})/\text{SnBu}_3/\text{SiO}_2$ .

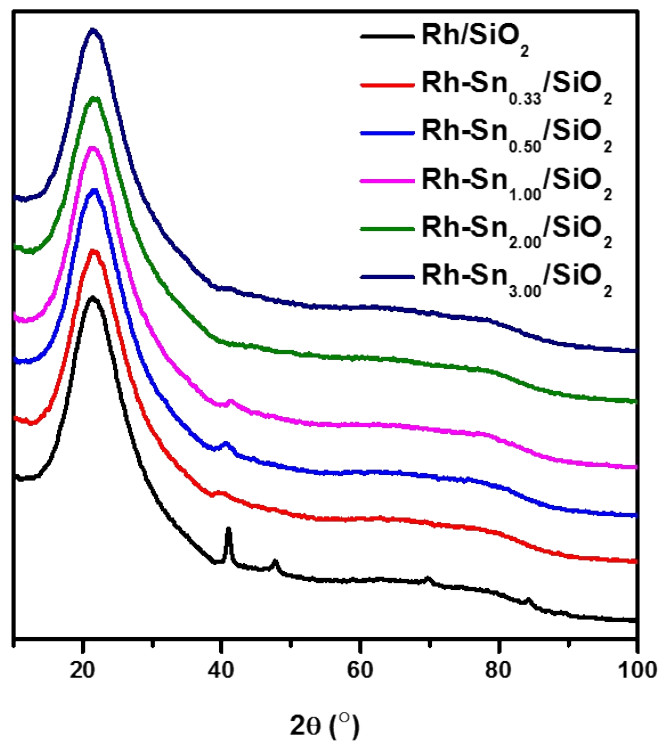

**Figure S4.** XRD patterns of Rh-Sn/SiO<sub>2</sub> bimetallic catalysts with different Sn/Rh ratios.

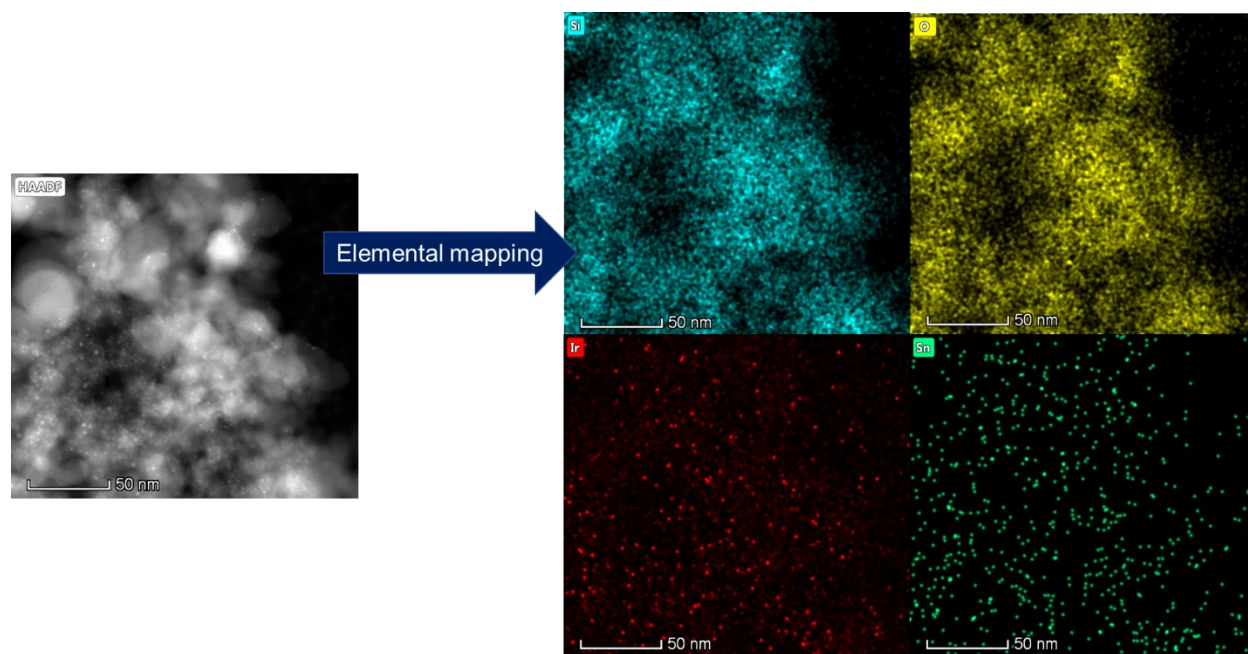

**Figure S5.** STEM-EDS elemental mapping of Ir-Sn/SiO<sub>2</sub> bimetallic catalyst.

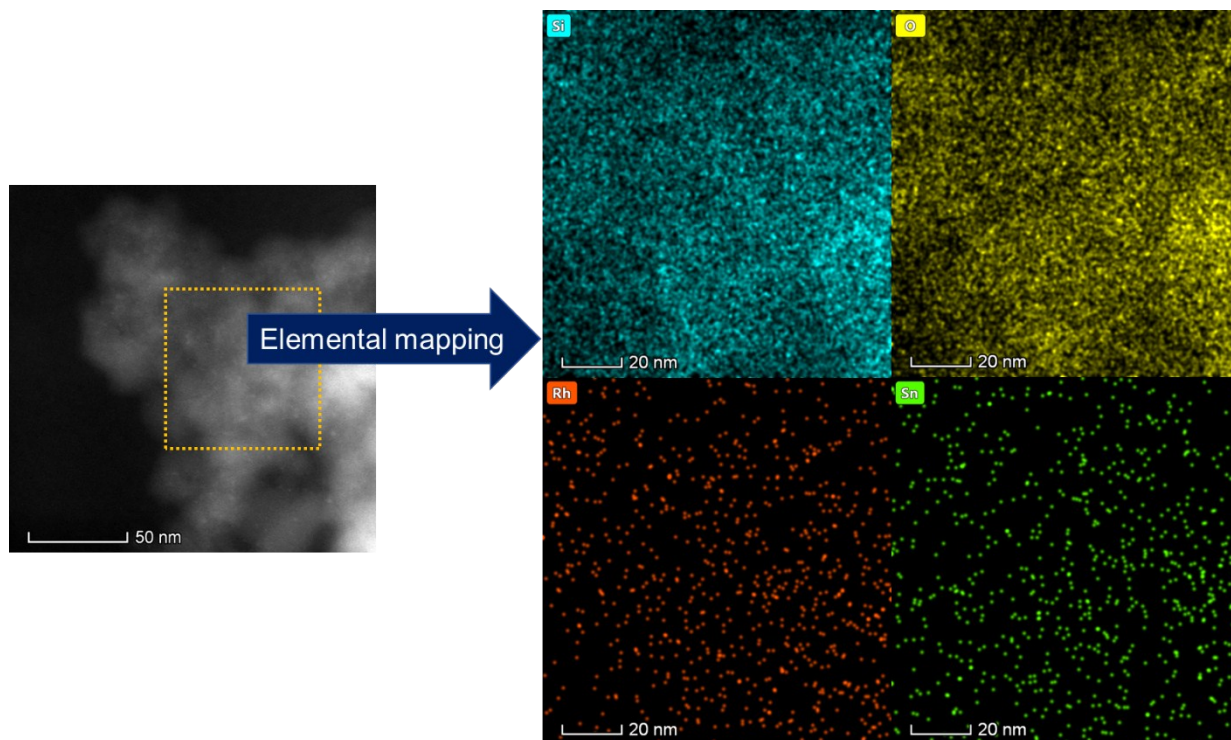

**Figure S6.** STEM-EDS elemental mapping of Rh-Sn/SiO<sub>2</sub> bimetallic catalyst.

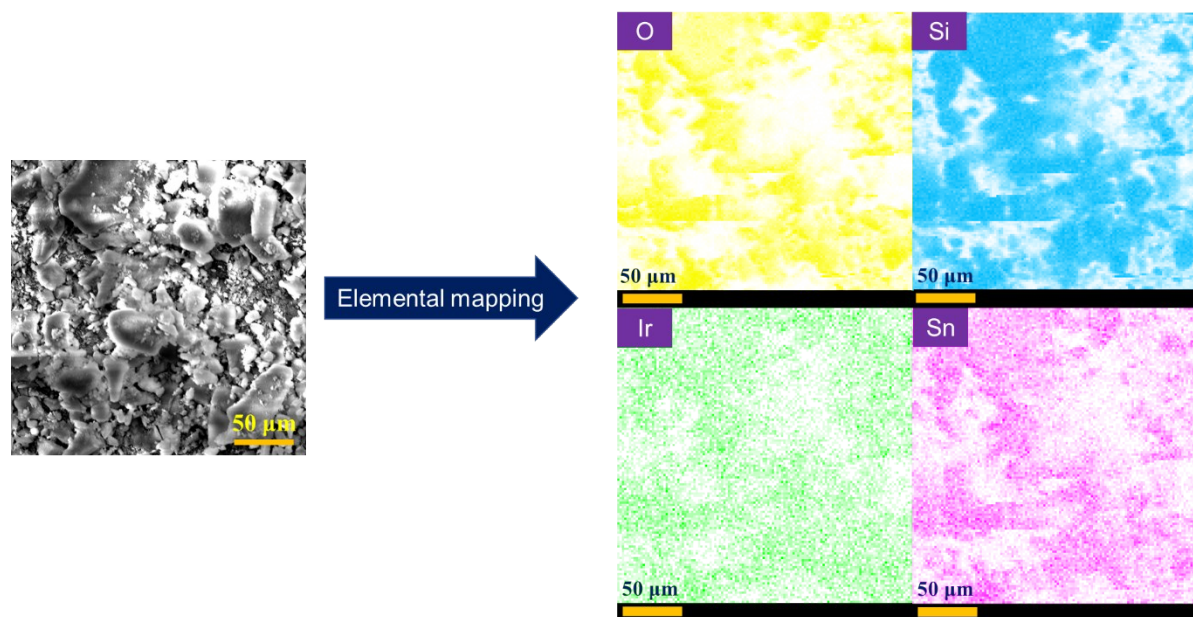

**Figure S7.** SEM-EDS elemental mapping of Ir-Sn/SiO<sub>2</sub> bimetallic catalyst.



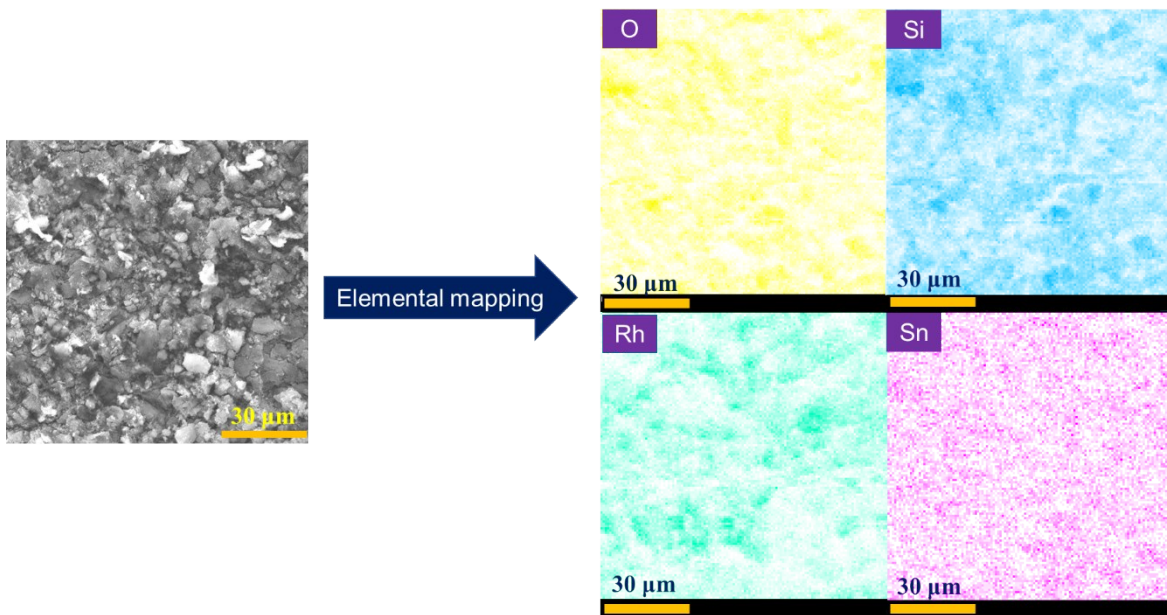

**Figure S8.** SEM-EDS elemental mapping of Rh-Sn/SiO<sub>2</sub> bimetallic catalyst.

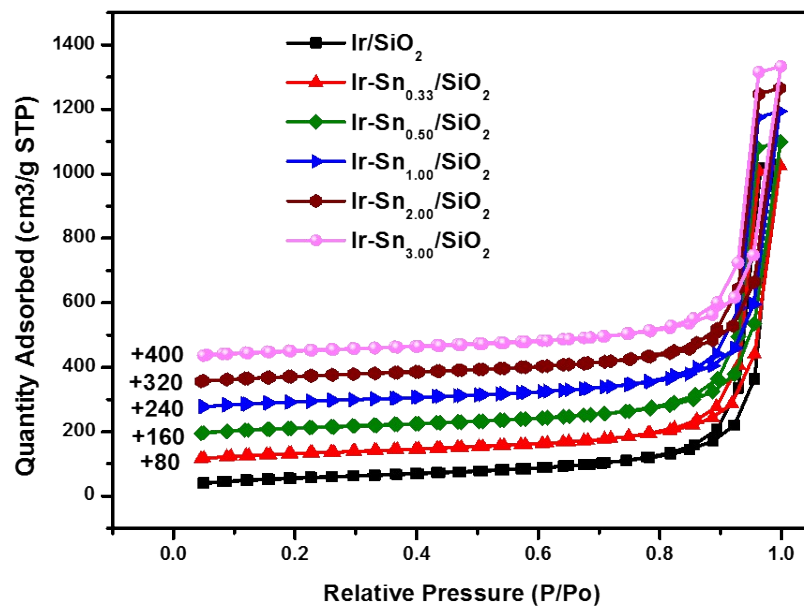

**Figure S9.** Nitrogen adsorption isotherms of Ir-Sn/SiO<sub>2</sub> samples with different Sn/Ir ratios.

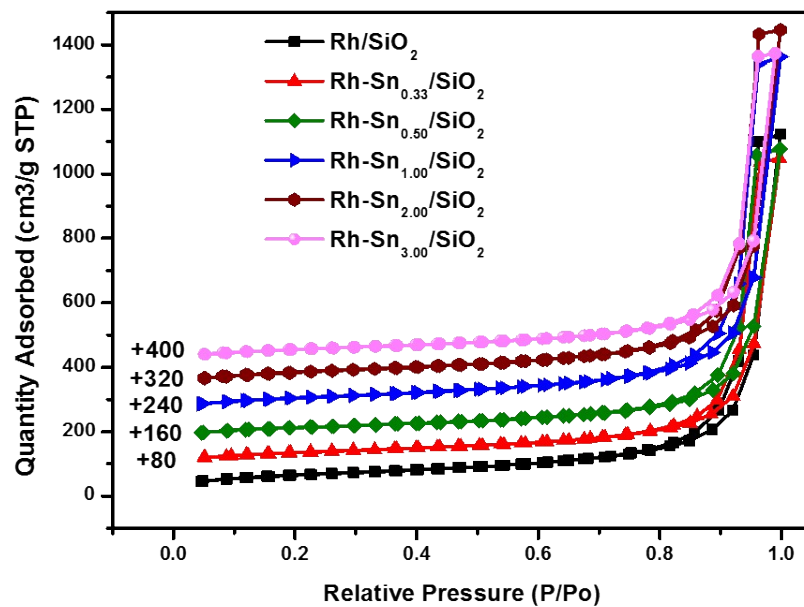

**Figure S10.** Nitrogen adsorption isotherms of Rh-Sn/SiO<sub>2</sub> samples with different Sn/Rh ratios.

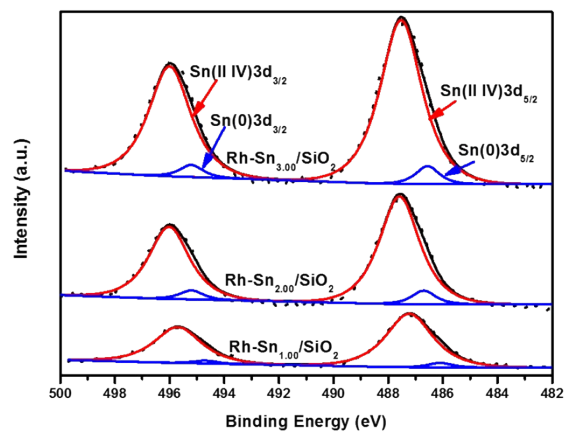

**Figure S11.** XPS of Sn 3d core level of Rh-Sn/SiO<sub>2</sub> bimetallic catalysts with Sn/Rh ratios of 1, 2 and 3.

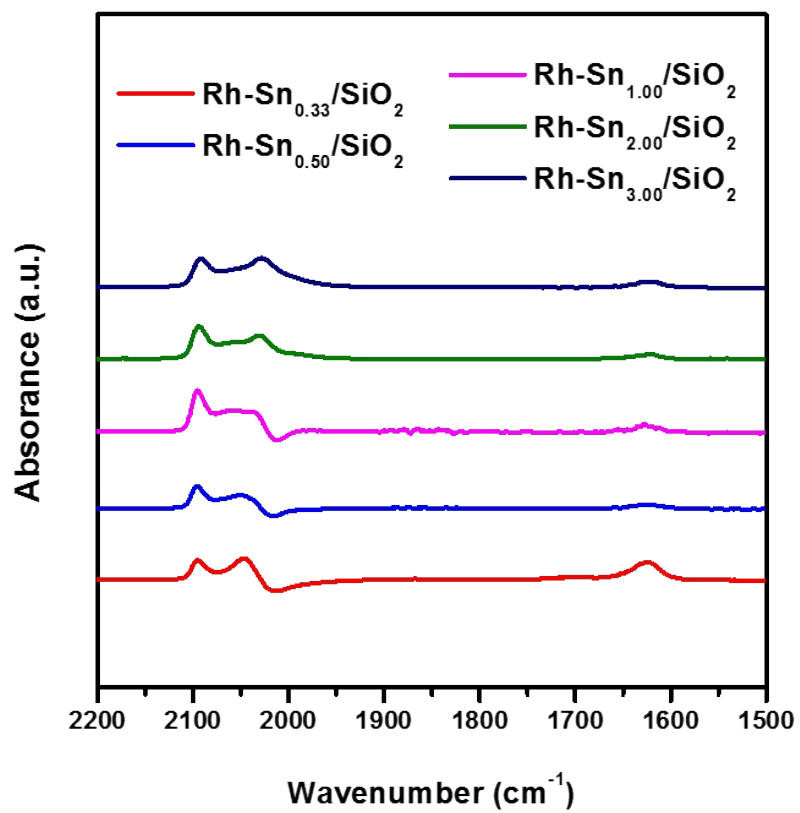

**Figure S12.** Infrared spectra of CO adsorbed on the Rh-Sn/SiO<sub>2</sub> bimetallic catalysts at room temperature.

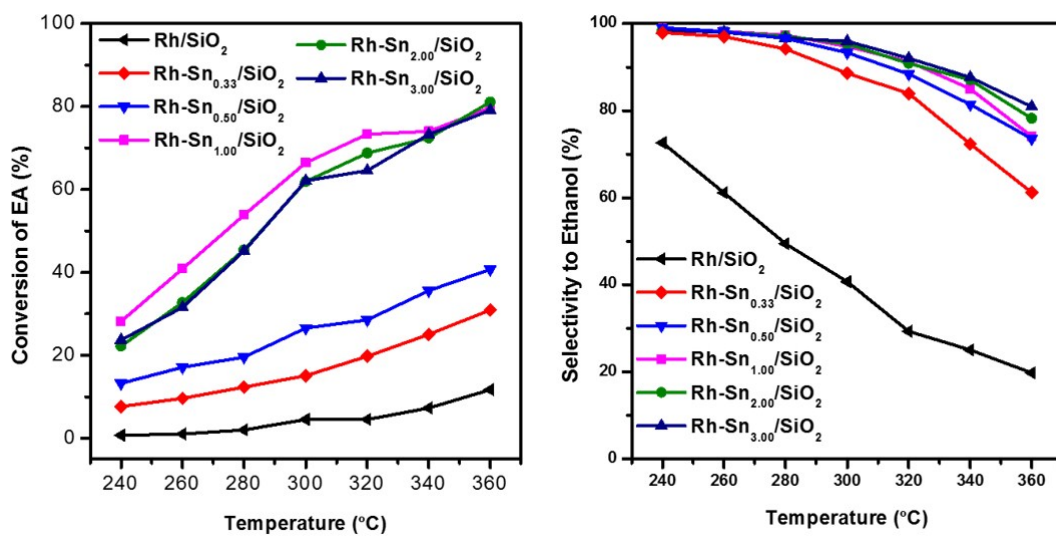

**Figure S13.** Catalytic performance of Rh-Sn/SiO<sub>2</sub> catalysts for ethyl acetate hydrogenolysis reaction from 240 to 360 °C. Reaction conditions: pressure=5 MPa, H<sub>2</sub>/ethyl acetate ratio=5 and WHSV=1.08 h<sup>-1</sup>.

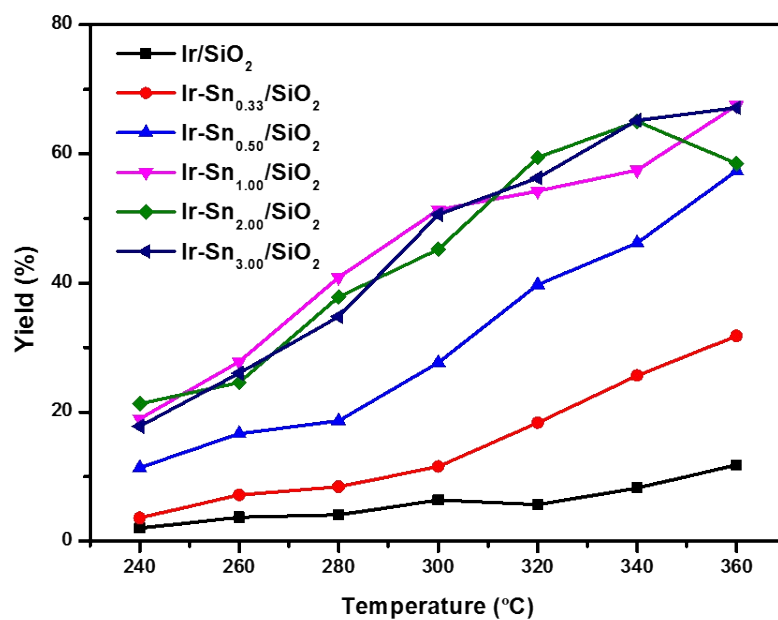

**Figure S14.** Ethanol yield achieved in ethyl acetate hydrogenolysis over Ir-Sn/SiO<sub>2</sub> catalysts with different Sn/Ir ratios. Reaction conditions: pressure=5 MPa, H<sub>2</sub>/ethyl acetate ratio=5 and WHSV=1.08 h<sup>-1</sup>.

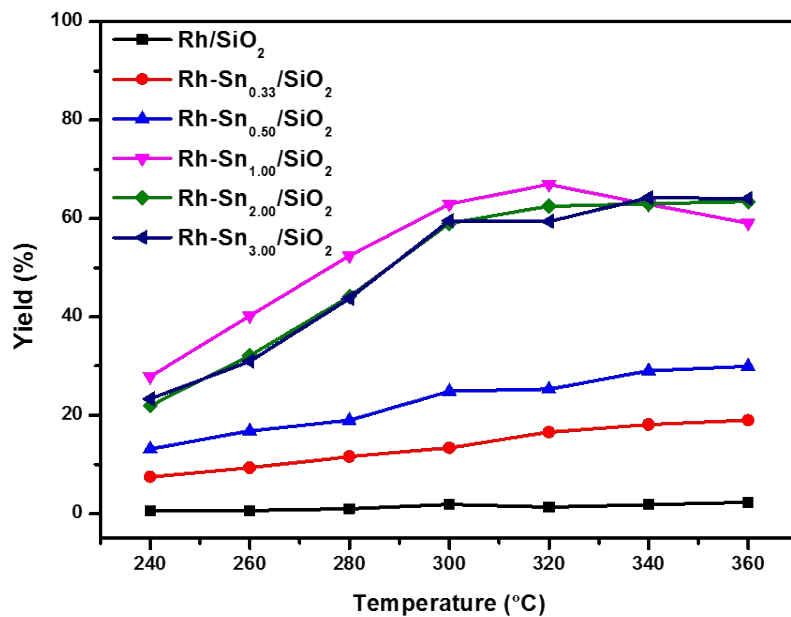

**Figure S15.** Ethanol yield achieved in ethyl acetate hydrogenolysis over Rh-Sn/SiO<sub>2</sub> catalysts with different Sn/Rh ratios. Reaction conditions: pressure=5 MPa, H<sub>2</sub>/ethyl acetate ratio=5 and WHSV=1.08 h<sup>-1</sup>.



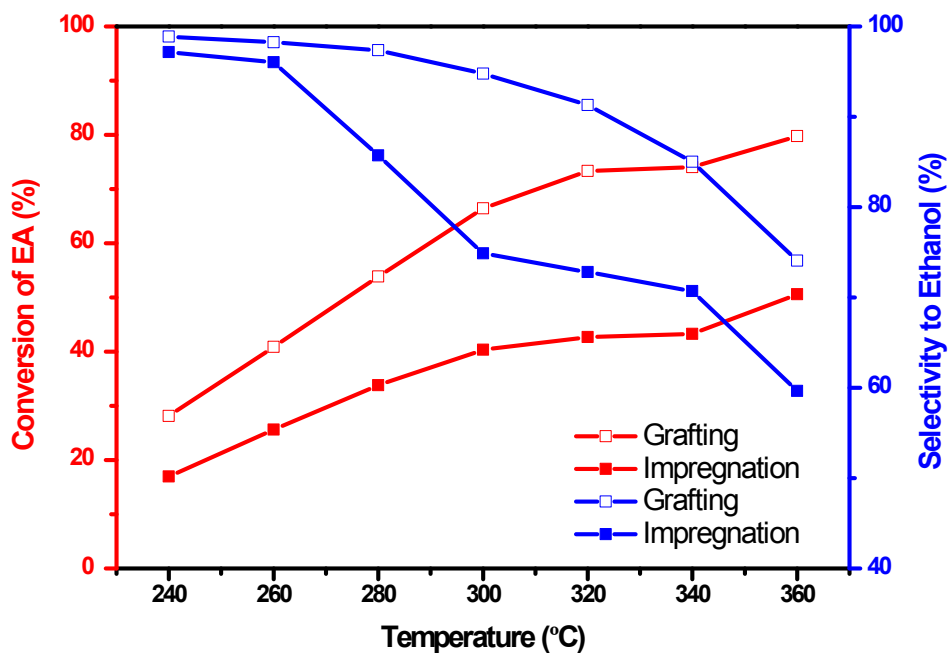

**Figure 16.** Ethyl acetate conversion and ethanol selectivity over Rh-Sn<sub>1.00</sub>/SiO<sub>2</sub> catalysts from grafting and impregnation synthesis. Reaction conditions: pressure=5 MPa, H<sub>2</sub>/ethyl acetate ratio=5 and WHSV=1.08 h<sup>-1</sup>.

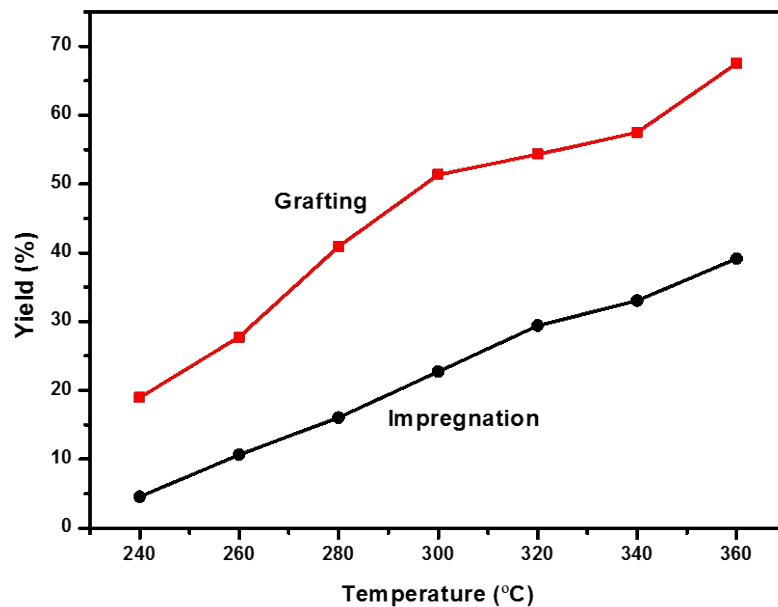

**Figure S17.** Ethanol yield achieved over Ir-Sn<sub>1.00</sub>/SiO<sub>2</sub> catalysts from grafting and impregnation syntheses. Reaction conditions: pressure=5 MPa, H<sub>2</sub>/ethyl acetate ratio=5 and WHSV=1.08 h<sup>-1</sup>.

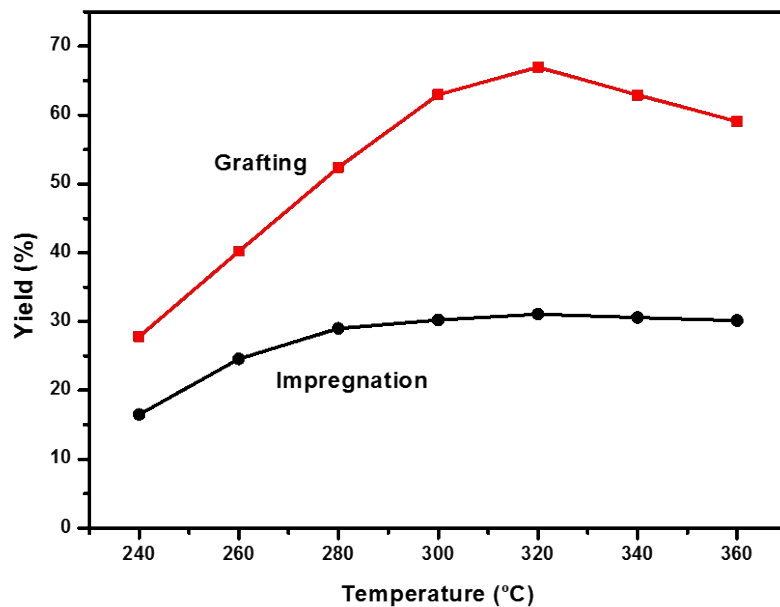

**Figure S18.** Ethanol yield achieved over Rh-Sn<sub>1.00</sub>/SiO<sub>2</sub> catalysts from grafting and impregnation syntheses. Reaction conditions: pressure=5 MPa, H<sub>2</sub>/ethyl acetate ratio=5 and WHSV=1.08 h<sup>-1</sup>.

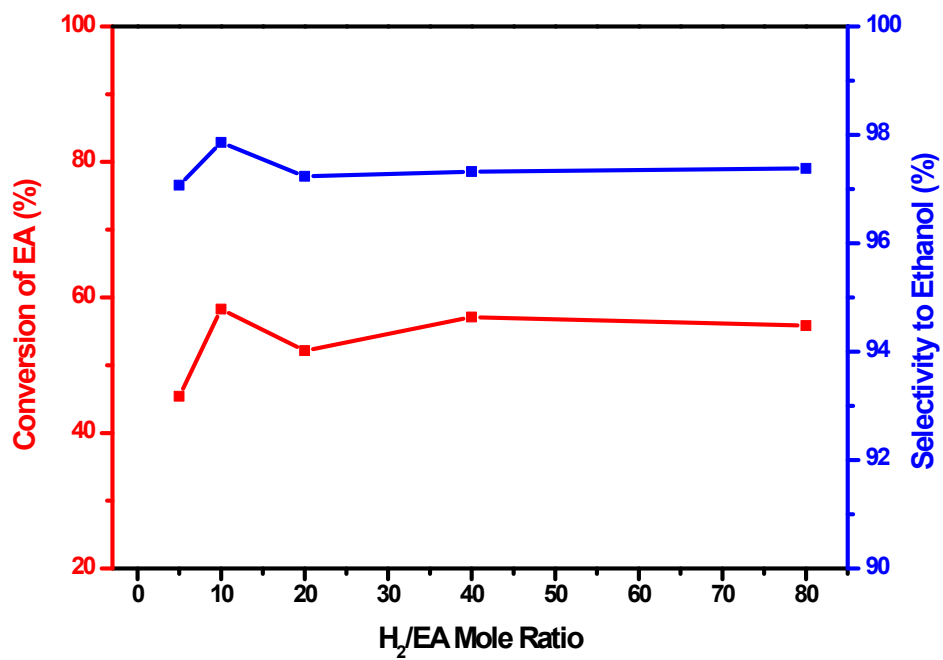

**Figure S19.** The effect of H<sub>2</sub>/ethyl acetate ratios on the catalytic performance of Rh-Sn<sub>1.00</sub>/SiO<sub>2</sub> catalyst. Reaction conditions: temperature=300 °C, pressure=5 MPa and WHSV= 1.08 h<sup>-1</sup>.

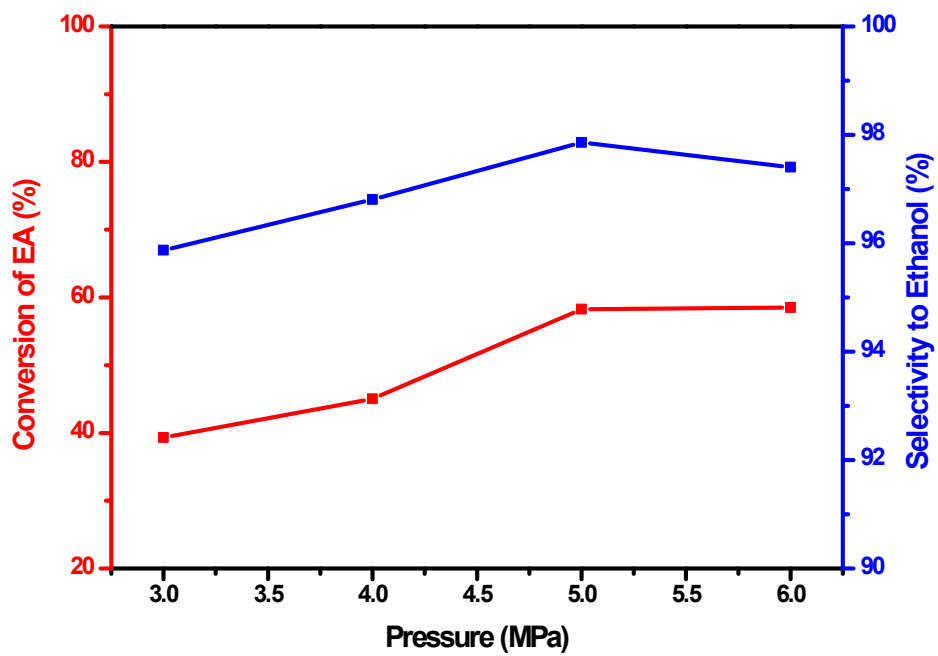

**Figure S20.** The effect of reaction pressure on the catalytic performance of Rh-Sn<sub>1.00</sub>/SiO<sub>2</sub> catalyst. Reaction conditions: temperature=300 °C, H<sub>2</sub>/ethyl acetate ratio=10 and WHSV=1.08 h<sup>-1</sup>.

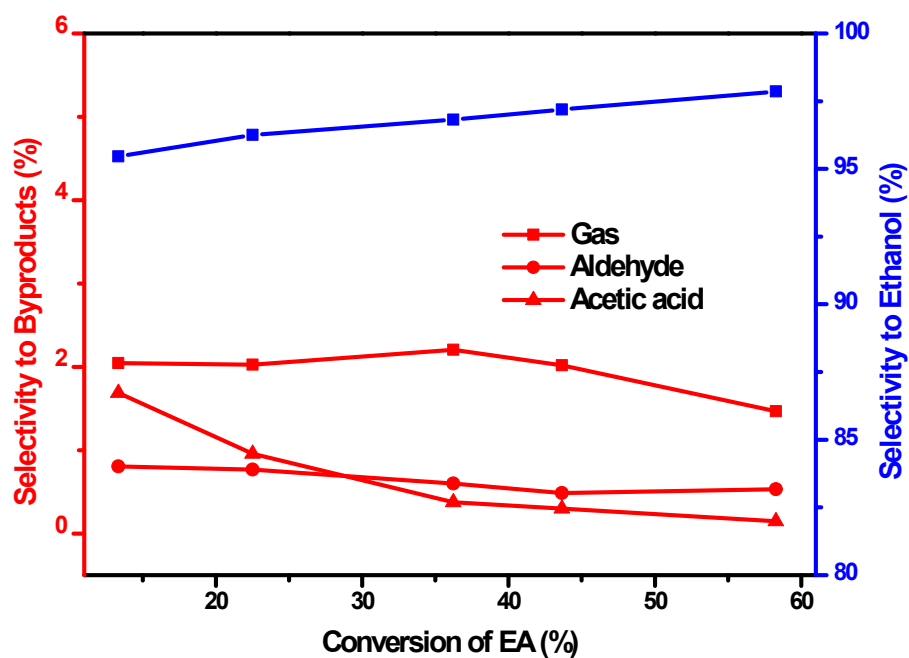

**Figure S21.** Product selectivity versus ethyl acetate conversion over Rh-Sn<sub>1.00</sub>/SiO<sub>2</sub> at 280 °C. Reaction conditions: pressure=5 MPa and H<sub>2</sub>/ethyl acetate ratio=10.

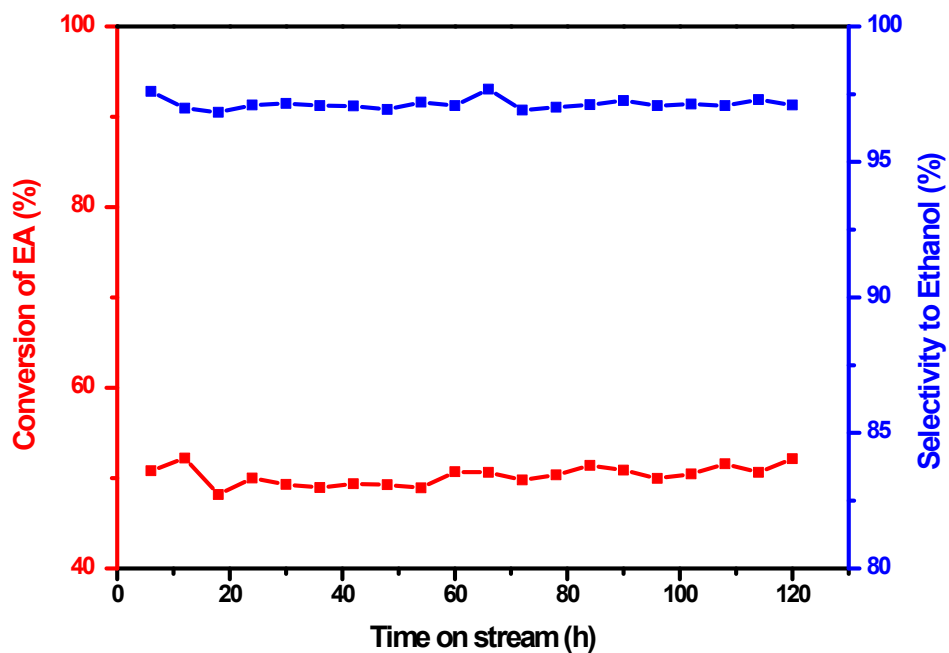

**Figure S22.** Stability of Rh-Sn<sub>1.00</sub>/SiO<sub>2</sub> catalyst in ethyl acetate hydrogenolysis reaction. Reaction conditions: temperature=280 °C, pressure=5 MPa, H<sub>2</sub>/ethyl acetate ratio=10 and WHSV=1.08 h<sup>-1</sup>.
